# Supplementary material for: A novel mutation in the N-terminal domain of Drosophila BubR1 affects the spindle assembly checkpoint function of BubR1
Source: Oxford University Press journal article supplement (doi:10.1242/bio.021196), 2016-10-15
Supplement: bio021196supp.pdf [file bio021196supp.pdf]

## Supplemental Materials

**Table S1. Analysis of the mitotic parameters in WT and *bubR1-KAN* mutant neuroblasts**

| Strain<br>(No. of brains) | Time (min)<br>in<br>colchicine | Mitotic Density (SD) <sup>a</sup> | Relative<br>Mitotic<br>Density | %<br>aneuploidy<br>(SD) | Notes  |
|---------------------------|--------------------------------|-----------------------------------|--------------------------------|-------------------------|--------|
| WT (5)                    | 0                              | 2.22 (0.21)                       | 1                              | 0.23 (0.17)             | viable |
| WT (5)                    | 30                             | 3.61 (0.26)                       | 1.63                           | NA                      | NA     |
| WT (5)                    | 60                             | 6.68 (0.38)                       | 3.01                           | NA                      | NA     |
| <i>bubR1-KAN</i> (5)      | 0                              | 2.16 (0.32)                       | 1                              | 0.47 (0.23)             | viable |
| <i>bubR1-KAN</i> (5)      | 30                             | 1.91 (0.28)                       | 0.88                           | NA                      | NA     |
| <i>bubR1-KAN</i> (5)      | 60                             | 1.84 (0.23)                       | 0.85                           | NA                      | NA     |

NA, not applicable

SD, standard deviation

<sup>a</sup> Mitotic density is defined as the mean number of cells in mitosis per optic field.

## Supplementary Information

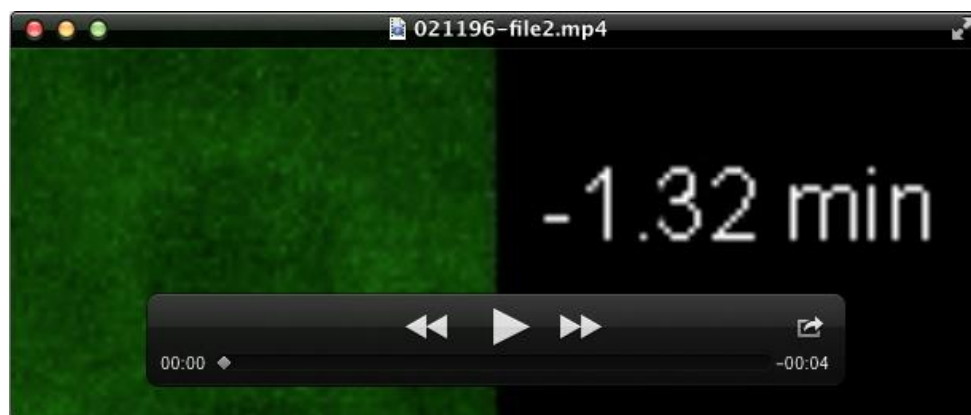

### **Movie S1**

Mitotic timing in a WT neuroblast. WT *Drosophila* larval neuroblast labeled with GFP-Rod (green). The GFP-Rod channel corresponds to Fig. 2B. Images were acquired by confocal spinning disk microscopy. Frames were taken every 20 s for 9.9 min. The video is shown at 8 frames/s.

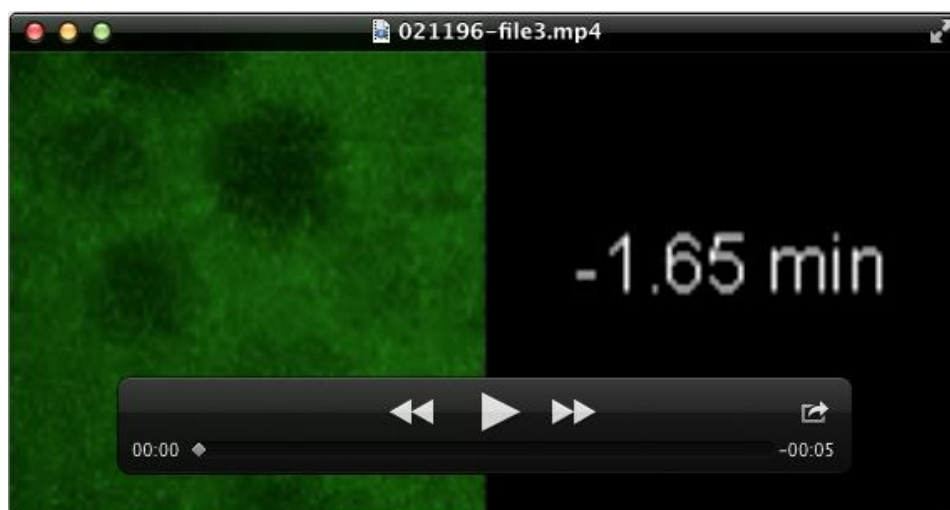

### **Movie S2**

Mitotic timing in a *bubR1-KEN1* mutant neuroblast. *bubR1-KEN1* mutant *Drosophila* larval neuroblast labeled with GFP-Rod (green). The GFP-Rod channel corresponds to Fig. 2C. Images were acquired by confocal spinning disk microscopy. Frames were taken every 20 s for 11.55 min. The video is shown at 8 frames/s.

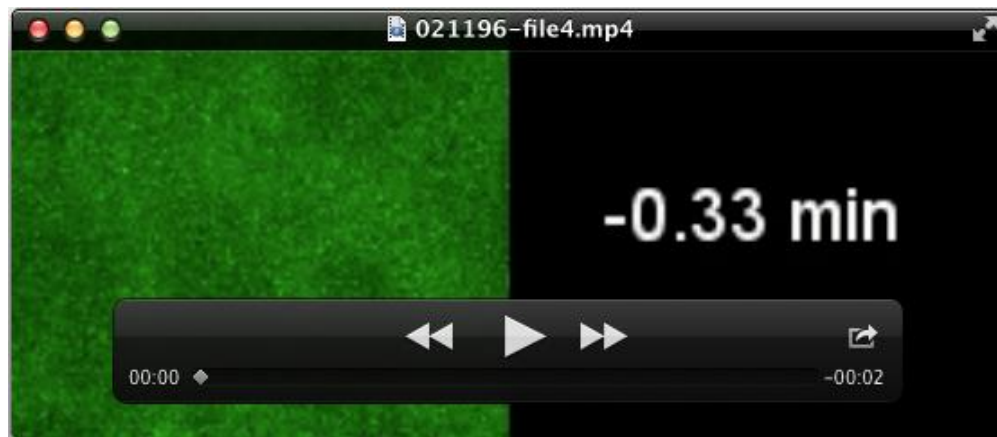

### Movie S3

Mitotic timing in a *bubR1-KAN* mutant neuroblast. *bubR1-KAN* mutant *Drosophila* larval neuroblast labeled with GFP-Rod (green). The GFP-Rod channel corresponds to Fig. 2D. Images were acquired by confocal spinning disk microscopy. Frames were taken every 20 s for 5.28 min. The video is shown at 8 frames/s.

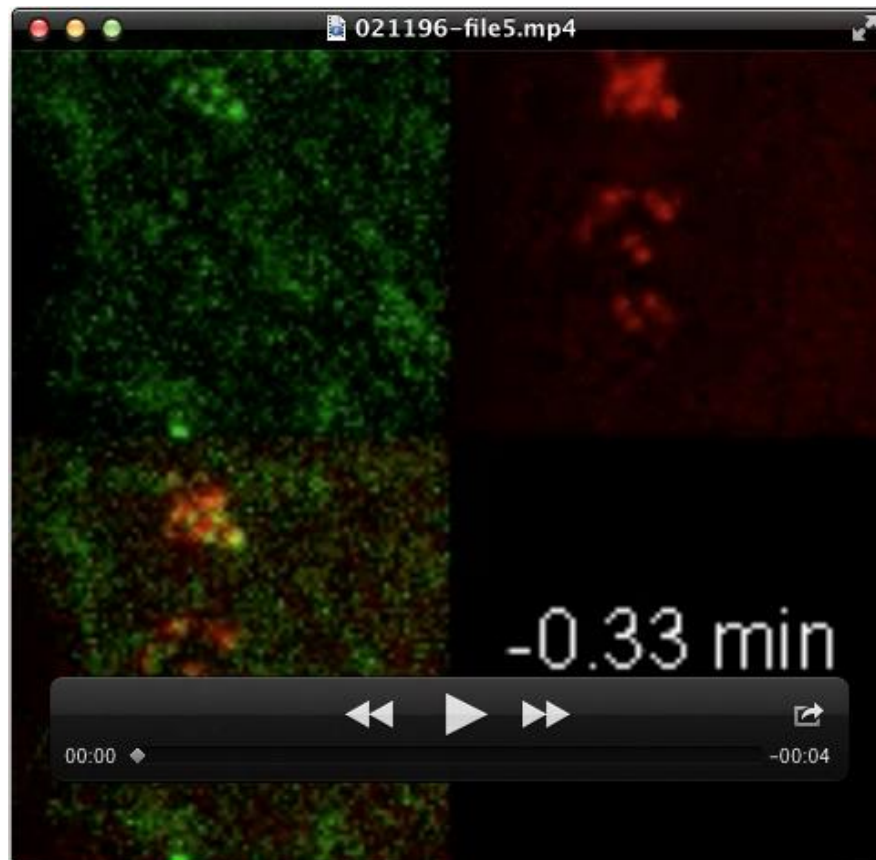

#### Movie S4

GFP-Fzy dynamics in a WT neuroblast. WT *Drosophila* larval neuroblast labeled with GFP-Fzy (green; top left) and RFP-BubR1-WT (red; top right). Merged images are shown in the bottom left panel. The GFP-Fzy channel corresponds to Fig. 3C. Images were acquired by confocal spinning disk microscopy. Frames were taken every 20 s for 11.22 min. The video is shown at 8 frames/s.

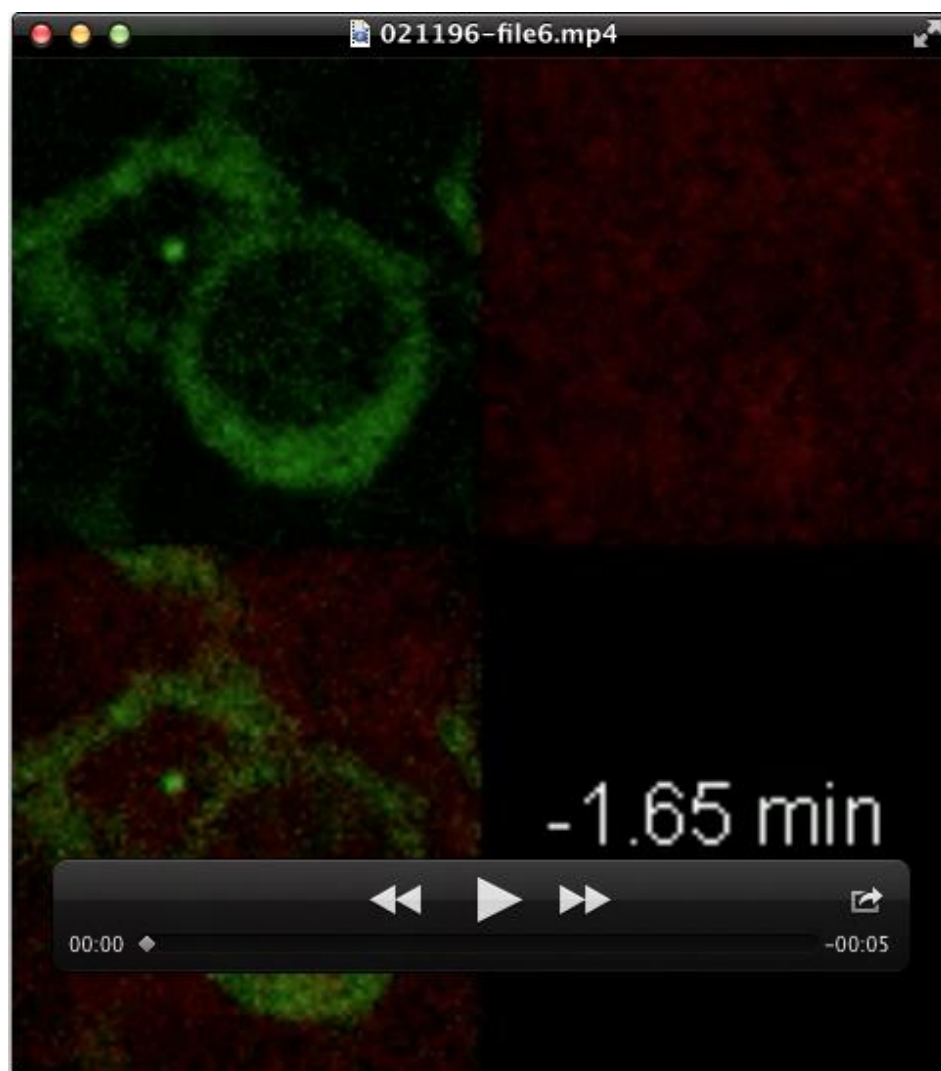

### Movie S5

GFP-Fzy dynamics in a *bubR1-KEN1* mutant neuroblast. *bubR1-KEN1* mutant *Drosophila* larval neuroblast labeled with GFP-Fzy (green; top left) and RFP-BubR1-KEN1 (red; top right). Merged images are shown in the bottom left panel. The GFP-Fzy channel corresponds to Fig. 3D. Images were acquired by confocal spinning disk microscopy. Frames were taken every 20 s for 13.20 min. The video is shown at 8 frames/s.

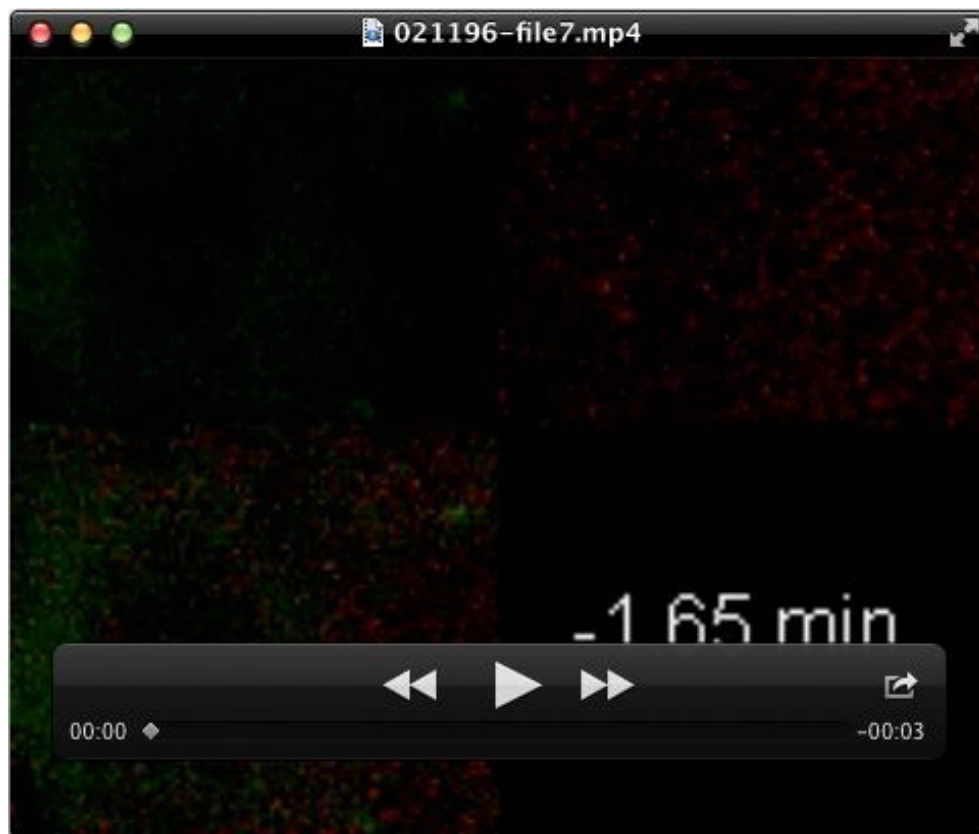

## Movie S6

GFP-Fzy dynamics in a *bubR1-KAN* mutant neuroblast. *bubR1-KAN* mutant *Drosophila* larval neuroblast labeled with GFP-Fzy (green; top left) and RFP-BubR1-KAN (red; top right). Merged images are shown in the bottom left panel. The GFP-Fzy channel corresponds to Fig. 3E. Images were acquired by confocal spinning disk microscopy. Frames were taken every 20 s for 6.93 min. The video is shown at 8 frames/s.

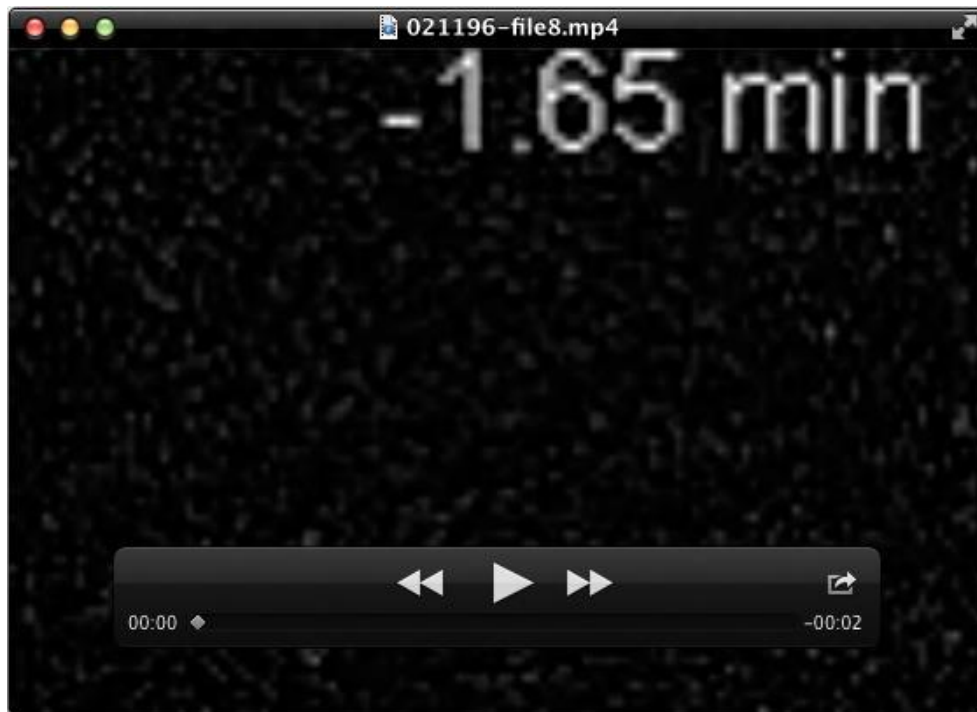

### Movie S7

Mitotic timing in a *bubR1-E481K* mutant neuroblast. *bubR1-E481K* mutant *Drosophila* larval neuroblast labeled with RFP-Spc25. The RFP-Spc25 channel corresponds to Fig. 4B. Images were acquired by confocal spinning disk microscopy. Frames were taken every 20 s for 5.61 min. The video is shown at 8 frames/s.
